# Supplementary material
Source: PubMed Central journal article supplement (PMC3546228)
Supplement: NIHMS415513-supplement-01.pdf [file NIHMS415513-supplement-01.pdf]

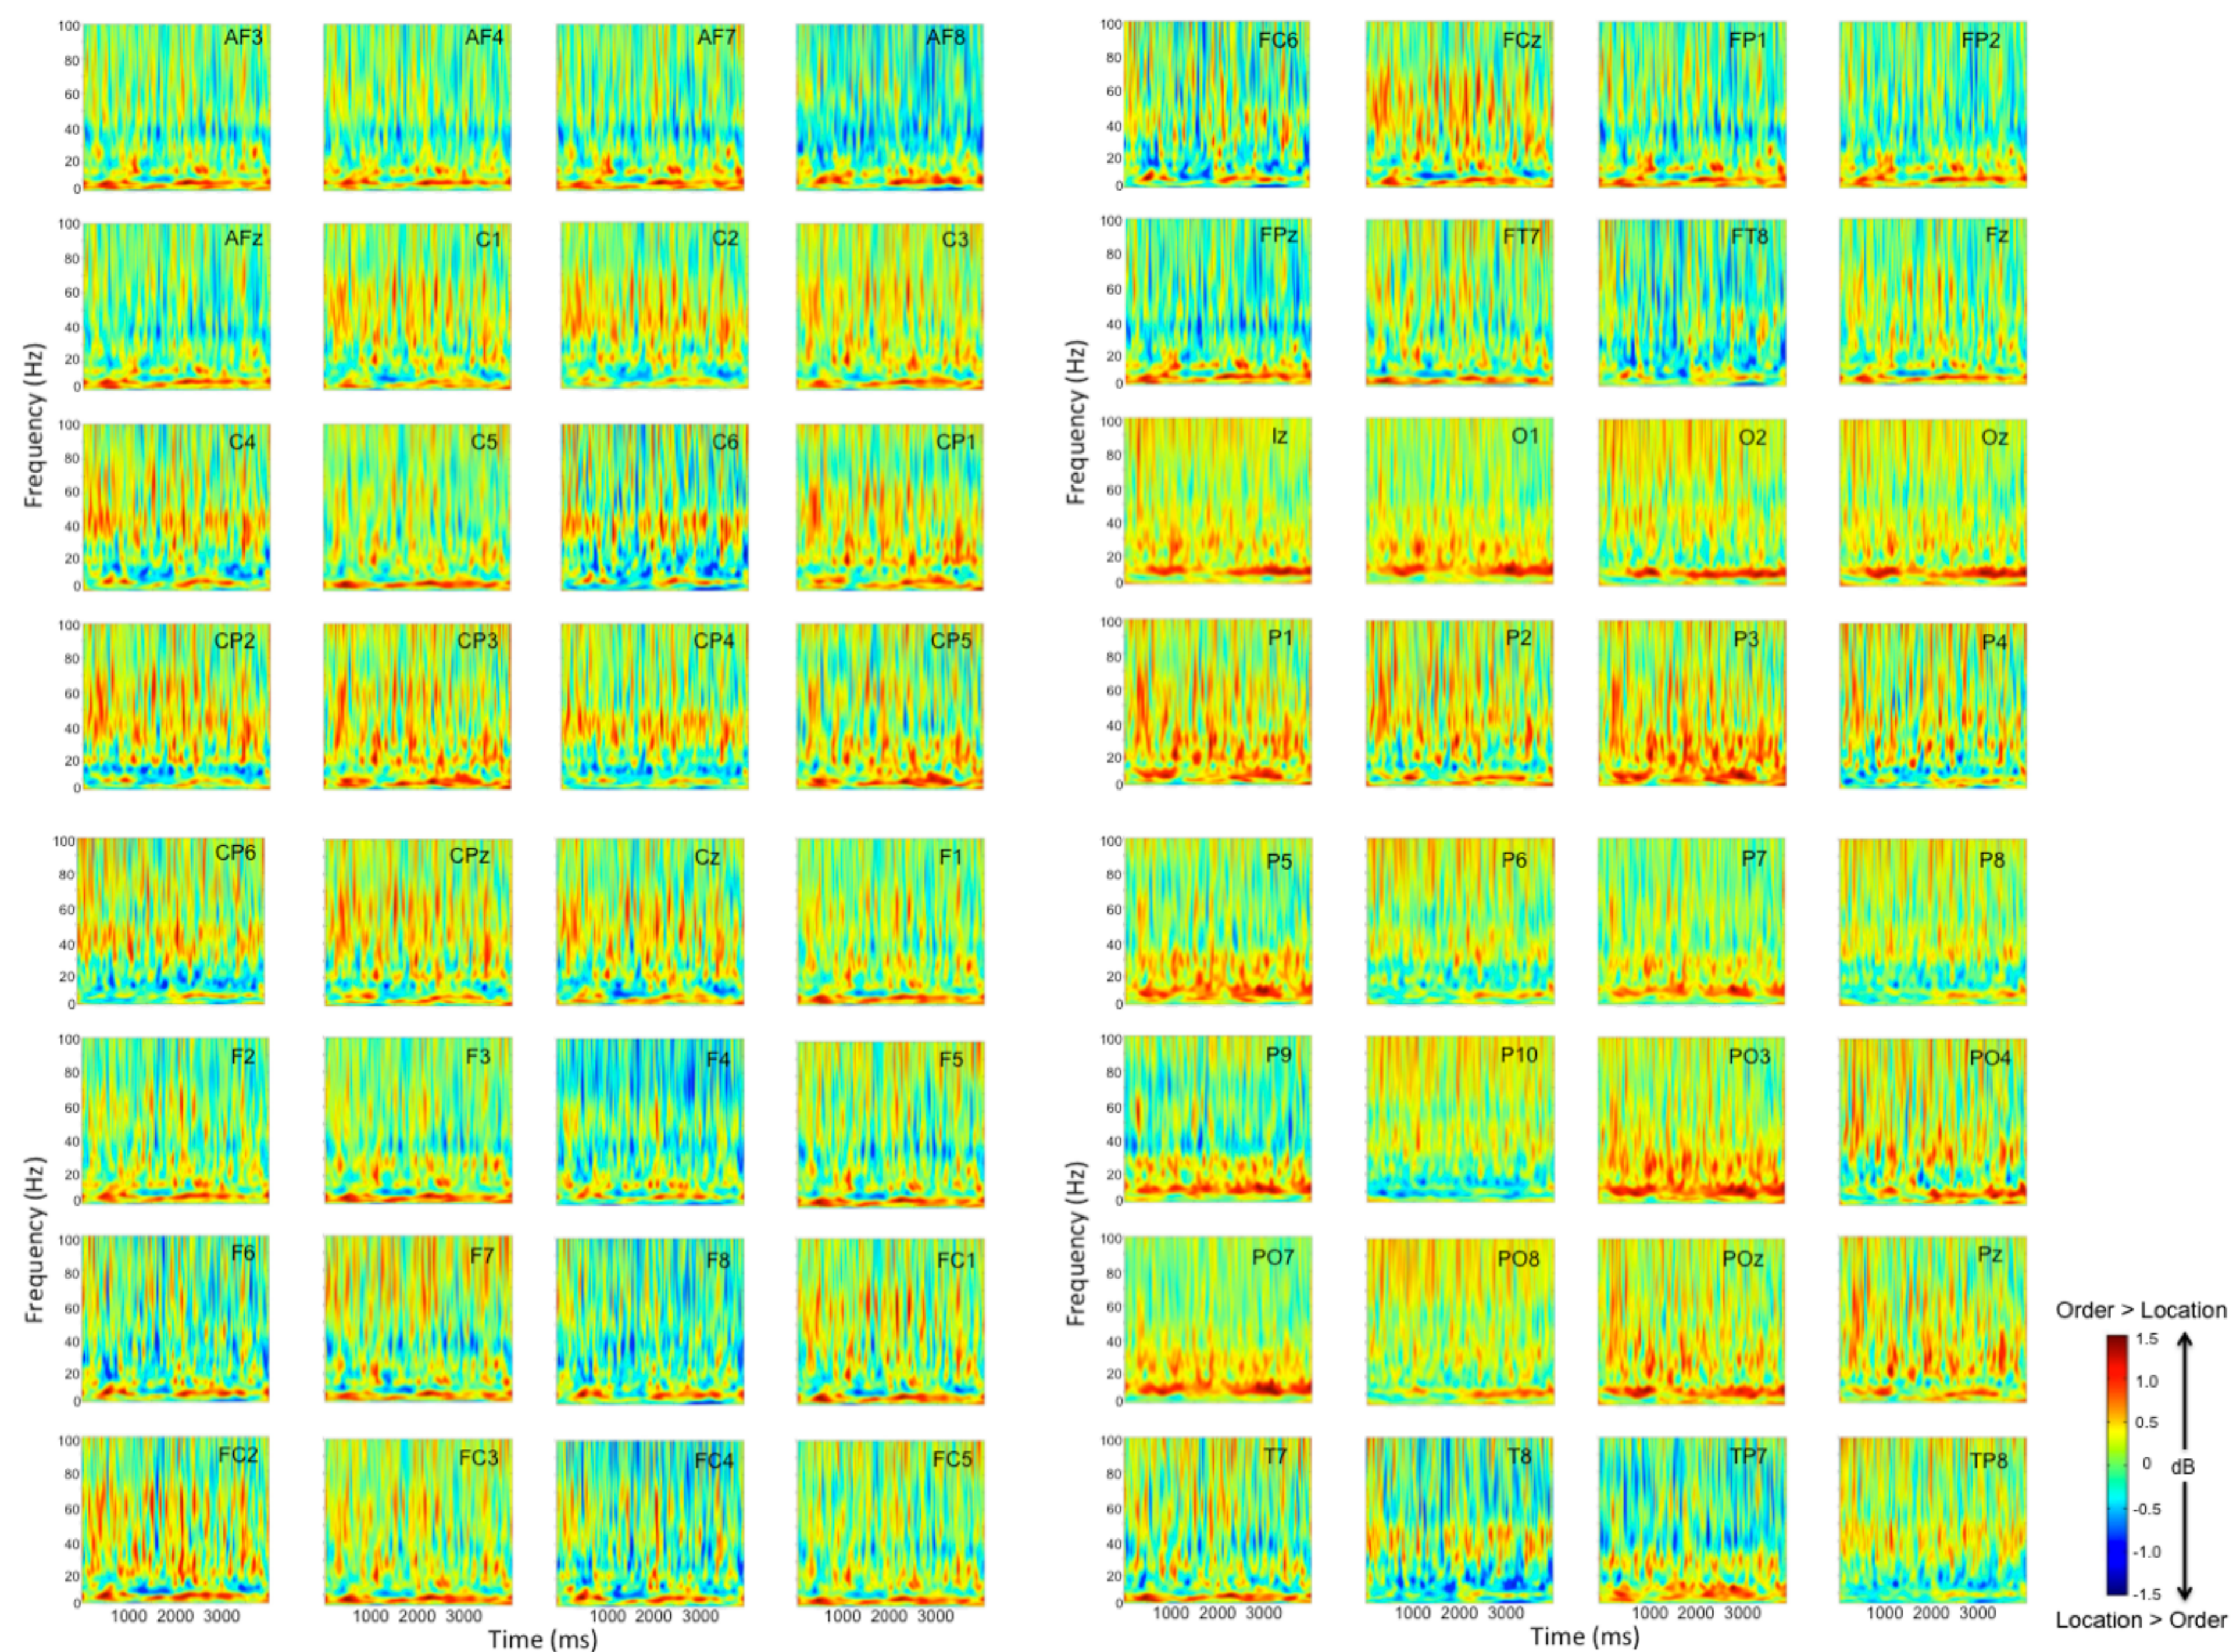

Supplemental Figure 1. Averaged time-frequency spectrograms of the difference in oscillatory power between correct order and correct spatial location trials are shown across all 64 electrode sites across the duration of the delay period. Red/hot colors represent activity that is greater in correct temporal trials compared to correct spatial trials; blue/cool colors represent activity that is greater in correct spatial trials compared to correct temporal trials. Electrode sites are displayed in alphabetical order.
